# Supplementary material for: Preparation and temperature-controlled morphology of helical microrods composed of supramolecular α-cyclodextrin assemblies
Source: RSC Adv. 2023 Nov 23;13(49):34366–70. doi: 10.1039/d3ra07537k (PMC10665645; doi:10.1039/d3ra07537k)
Supplement: RA-013-D3RA07537K-s001 [file RA-013-D3RA07537K-s001.pdf]

## Supporting Information

### **Preparation and Temperature-controlled Morphology of Helical Microrods Composed of Supramolecular $\alpha$ -Cyclodextrin Assemblies**

Toshiyuki Kida,<sup>\*a,b</sup> Ayumi Teragaki,<sup>a</sup> Haruya Ishida,<sup>a</sup> Sayaka Sonoda,<sup>a</sup> Momoka Miyasaka<sup>a</sup>  
and Hajime Shigemitsu<sup>a,b</sup>

<sup>a</sup>*Department of Applied Chemistry, Graduate School of Engineering, Osaka University,  
2-1 Yamada-oka, Suita, Osaka 565-08, Japan*

<sup>b</sup>*Integrated Frontier Research for Medical Science Division, Institute for Open and Transdisciplinary  
Research Initiatives (OTRI), Osaka University, 2-1 Yamada-oka, Suita, Osaka 565-0871, Japan*

#### **Contents**

- 1. Rheological properties of organogels formed by mixing a HFIP solution of  $\alpha$ -CD and 2-pentanol**
- 2. 2-Pentanol/HFIP molar ratio in the  $\alpha$ -CD/HFIP/2-pentanol gel and the solution (supernatant) produced from the gel after about 10 months of storage**
- 3. SEM images of precipitates obtained by allowing the  $\alpha$ -CD/HFIP/2-pentanol gel to stand under high humidity conditions**
- 4. XRD patterns of precipitates obtained by allowing the  $\alpha$ -CD/HFIP/2-pentanol gel to stand under high humidity conditions**
- 5. Molar ratios of H<sub>2</sub>O and 2-pentanol to  $\alpha$ -CD contained in microrods**

1. Rheological properties of organogels formed by mixing a HFIP solution of  $\alpha$ -CD and 2-pentanol

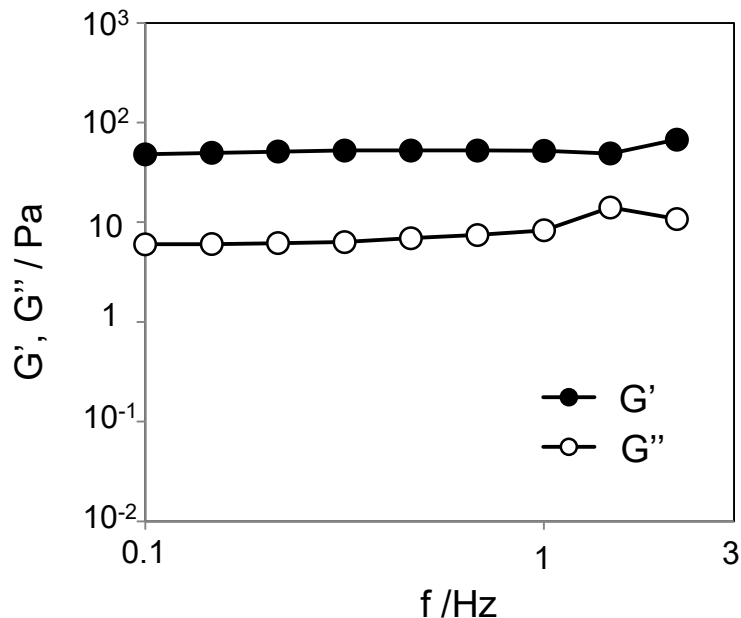

**Figure S1.** Plots of the storage modulus ( $G'$ ) and the loss modulus ( $G''$ ) of organogels, which were formed by stirring a mixture of an  $\alpha$ -CD/HFIP solution and 2-pentanol for 3 h, followed by allowing to stand for 72 h, against angular frequency (stress: 10 Pa).

2. 2-Pentanol/HFIP molar ratio in the  $\alpha$ -CD/HFIP/2-pentanol gel and the solution (supernatant) produced from the gel after about 10 months of storage

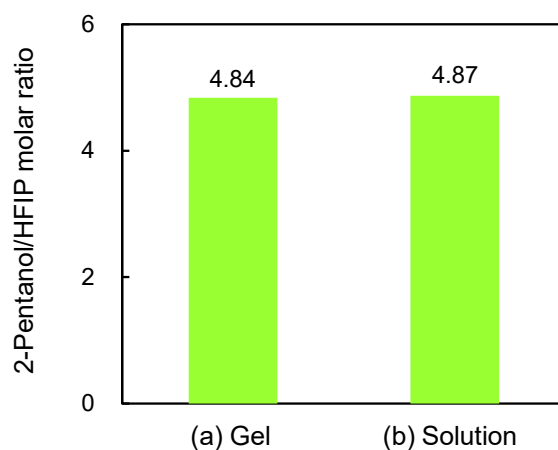

**Figure S2.** Molar ratio of 2-pentanol to HFIP (a) in the gel formed by stirring a mixture of  $\alpha$ -CD/HFIP solution (0.5 mL) [25 mM] and 2-pentanol (2.5 mL) for 3 h, followed by standing for 72 h, and (b) in the solution (supernatant) produced from the gel after standing for about 10 months.

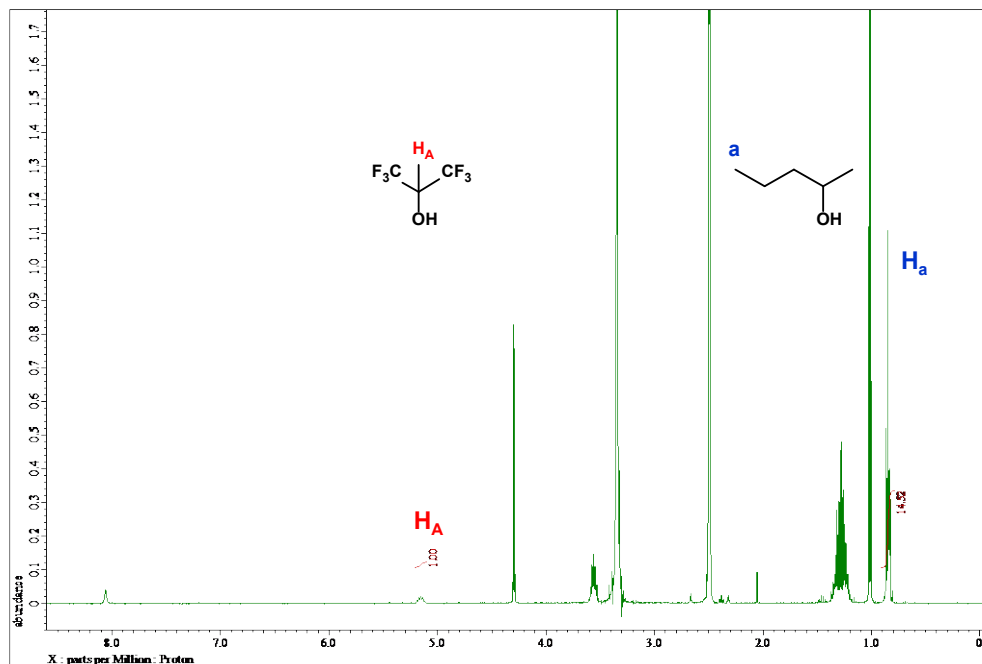

**Figure S3.**  $^1\text{H}$  NMR spectrum (solvent:  $\text{DMSO}-d_6$ ) of the gel formed by stirring a mixture of  $\alpha$ -CD/HFIP solution (0.5 mL) [25 mM] and 2-pentanol (2.5 mL) for 3 h, followed by standing for 72 h.

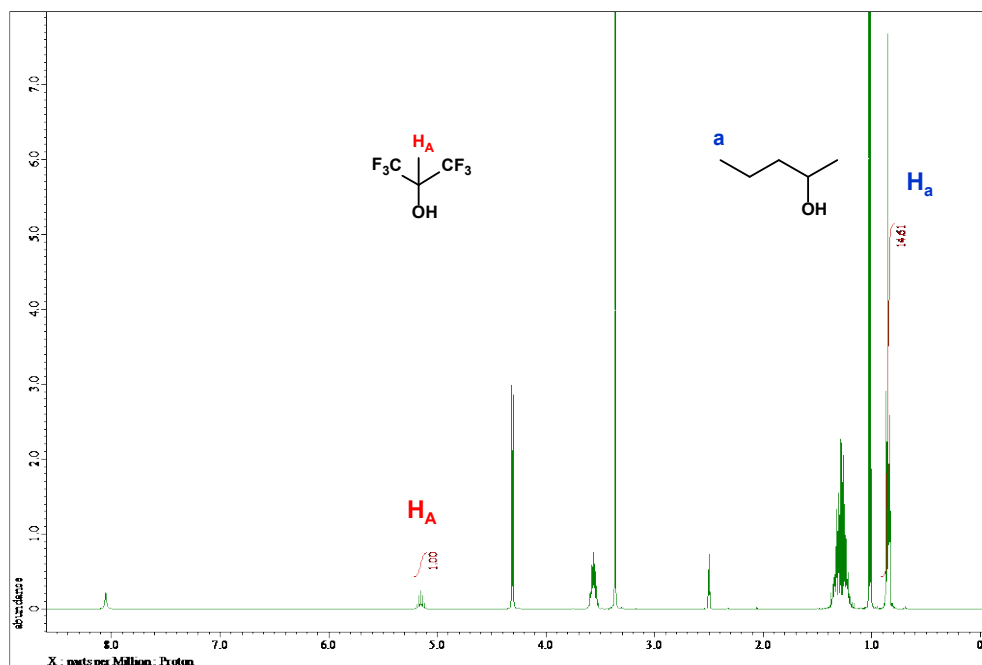

**Figure S4.**  $^1\text{H}$  NMR spectrum (solvent:  $\text{DMSO}-d_6$ ) of the solution (supernatant) produced from the  $\alpha$ -CD/HFIP/2-pentanol gel after standing for about 10 months.

3. SEM images of precipitates obtained by allowing the  $\alpha$ -CD/HFIP/2-pentanol gel to stand under high humidity conditions

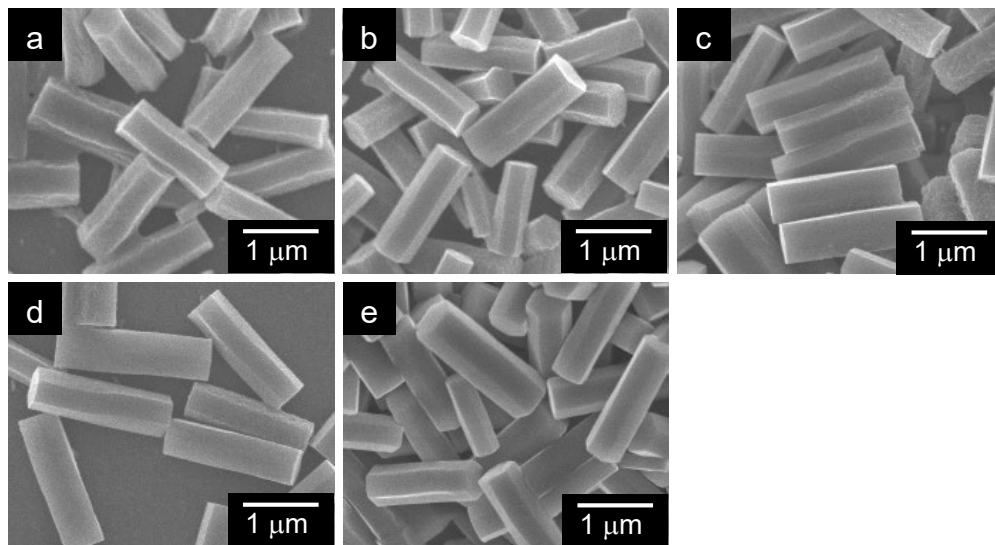

**Figure S5.** SEM images of precipitates obtained by allowing the  $\alpha$ -CD/HFIP/2-pentanol gel [an  $\alpha$ -CD/HFIP solution [25 mM]:2-pentanol = 1:5 (v/v)] to stand at 20 °C under high humidity conditions for (a) 6 h, (b) 12 h, (c) 36 h, (d) 48 h and (e) 120 h.

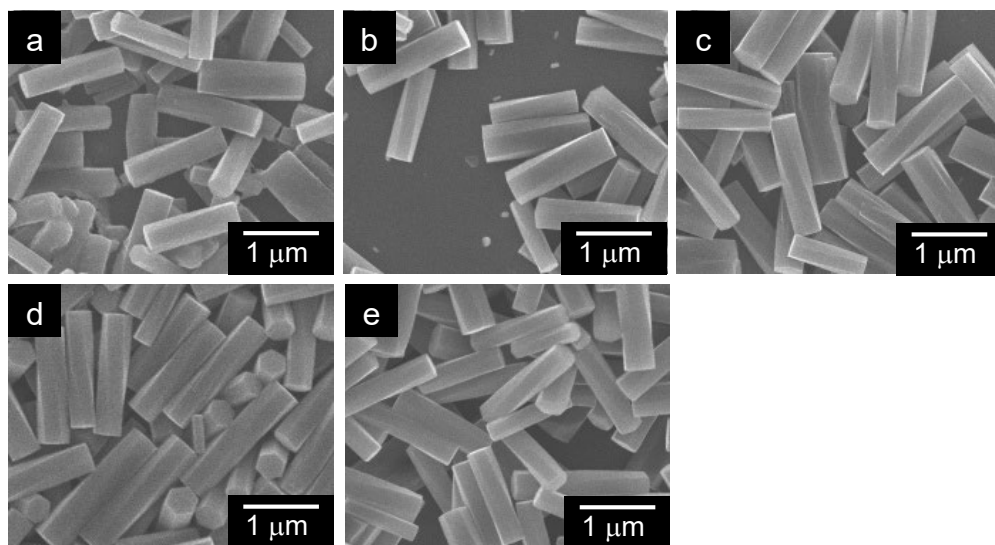

**Figure S6.** SEM images of precipitates obtained by allowing the  $\alpha$ -CD/HFIP/2-pentanol gel [an  $\alpha$ -CD/HFIP solution [25 mM]:2-pentanol = 1:5 (v/v)] to stand at 30 °C under high humidity conditions for (a) 6 h, (b) 12 h, (c) 36 h, (d) 48 h and (e) 120 h.

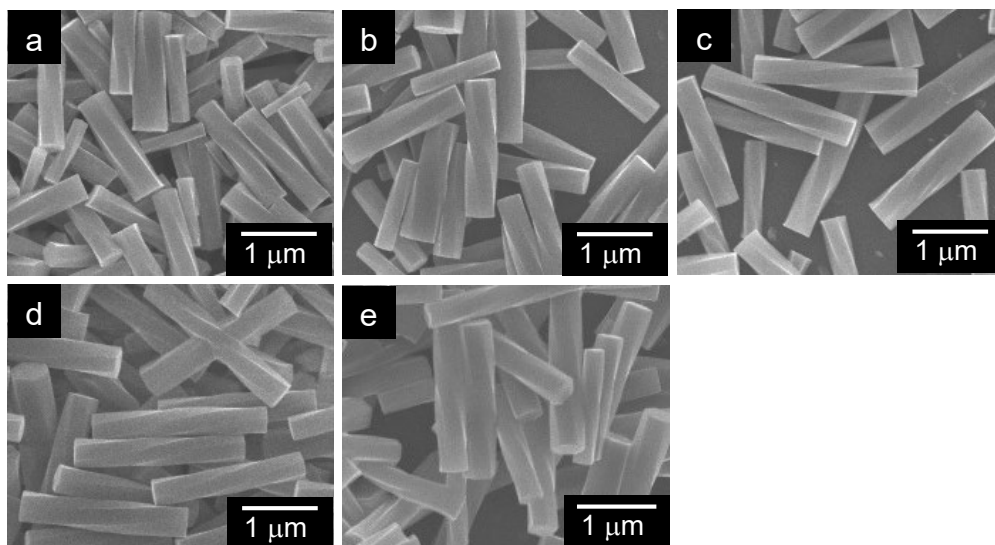

**Figure S7.** SEM images of precipitates obtained by allowing the  $\alpha$ -CD/HFIP/2-pentanol gel [an  $\alpha$ -CD/HFIP solution [25 mM]:2-pentanol = 1:5 (v/v)] to stand at 40 °C under high humidity conditions for (a) 6 h, (b) 12 h, (c) 36 h, (d) 48 h and (e) 120 h.

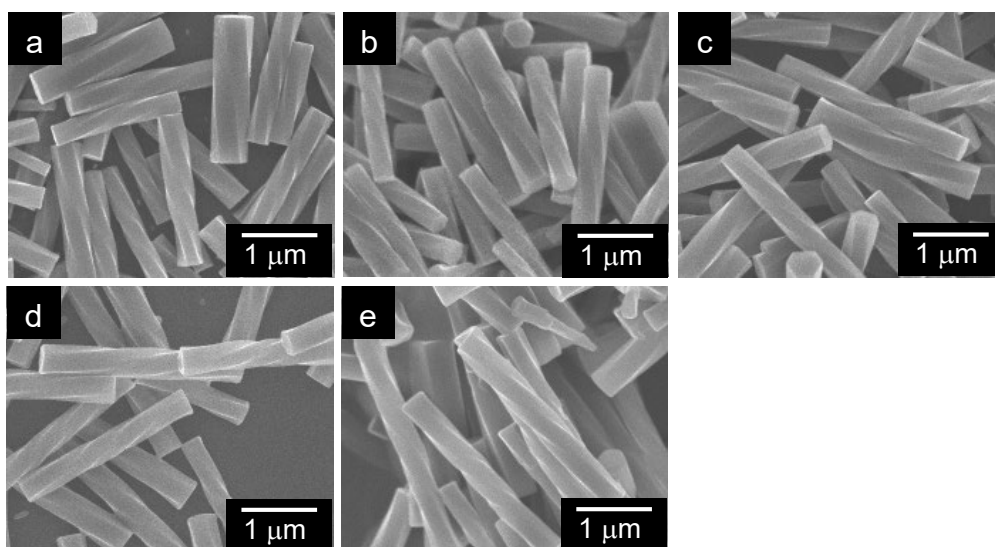

**Figure S8.** SEM images of precipitates obtained by allowing the  $\alpha$ -CD/HFIP/2-pentanol gel [an  $\alpha$ -CD/HFIP solution [25 mM]:2-pentanol = 1:5 (v/v)] to stand at 50 °C under high humidity conditions for (a) 6 h, (b) 12 h, (c) 36 h, (d) 48 h and (e) 120 h.

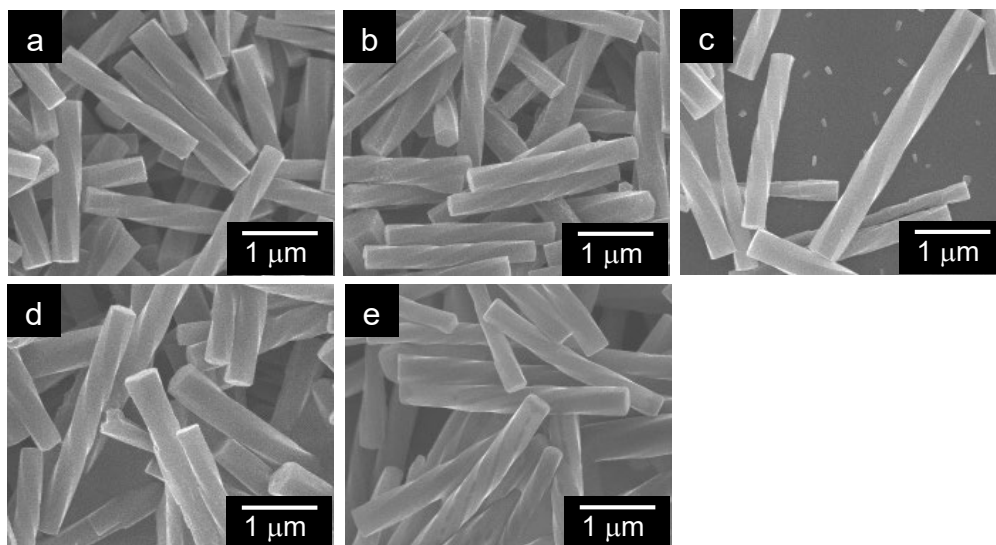

**Figure S9.** SEM images of precipitates obtained by allowing the  $\alpha$ -CD/HFIP/2-pentanol gel [an  $\alpha$ -CD/HFIP solution [25 mM]:2-pentanol = 1:5 (v/v)] to stand at 60 °C under high humidity conditions for (a) 6 h, (b) 12 h, (c) 36 h, (d) 48 h and (e) 120 h.

#### 4. XRD patterns of precipitates obtained by allowing the $\alpha$ -CD/HFIP/2-pentanol gel to stand under high humidity conditions

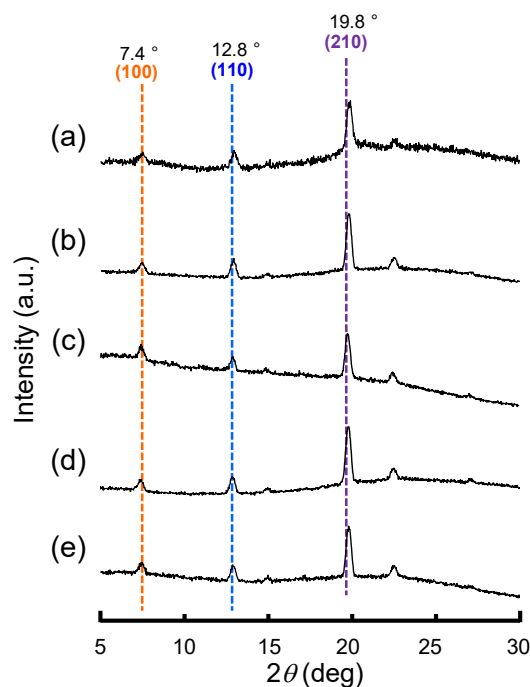

**Figure S10.** XRD patterns of precipitates obtained by allowing the  $\alpha$ -CD/HFIP/2-pentanol gel [an  $\alpha$ -CD/HFIP solution [25 mM]:2-pentanol = 1:5 (v/v)] to stand at 20 °C under high humidity conditions for (a) 6 h, (b) 12 h, (c) 36 h, (d) 48 h and (e) 120 h.

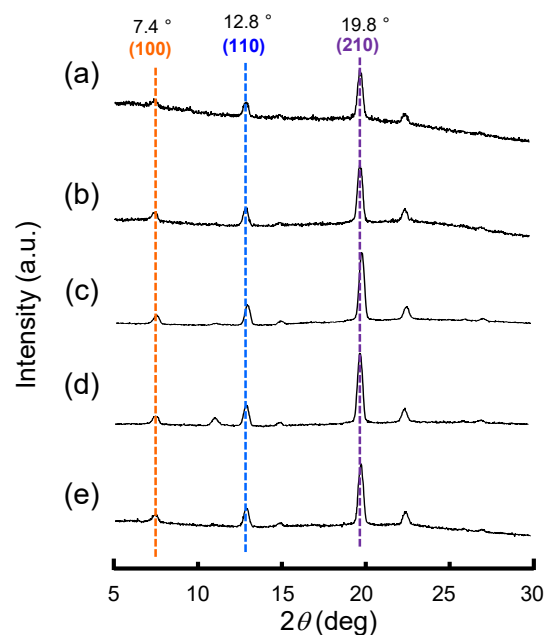

**Figure S11.** XRD patterns of precipitates obtained by allowing the  $\alpha$ -CD/HFIP/2-pentanol gel [an  $\alpha$ -CD/HFIP solution [25 mM]:2-pentanol = 1:5 (v/v)] to stand at 30 °C under high humidity conditions for (a) 6 h, (b) 12 h, (c) 36 h, (d) 48 h and (e) 120 h.

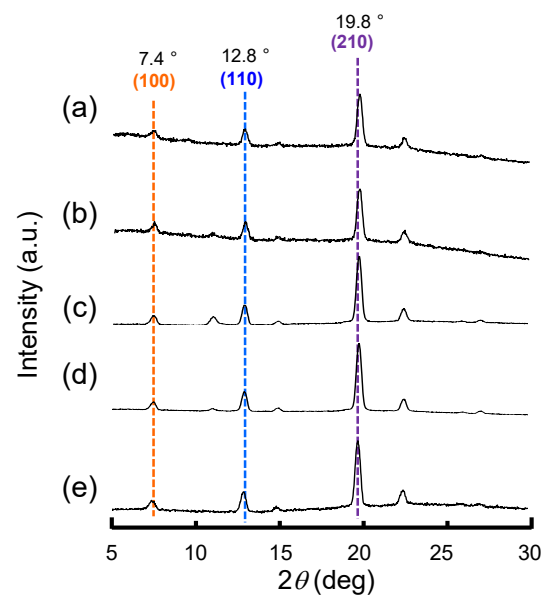

**Figure S12.** XRD patterns of precipitates obtained by allowing the  $\alpha$ -CD/HFIP/2-pentanol gel [an  $\alpha$ -CD/HFIP solution [25 mM]:2-pentanol = 1:5 (v/v)] to stand at 40 °C under high humidity conditions for (a) 6 h, (b) 12 h, (c) 36 h, (d) 48 h and (e) 120 h.

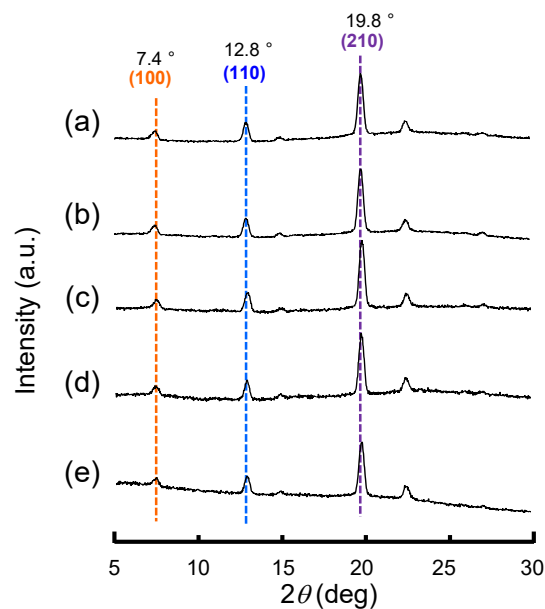

**Figure S13.** XRD patterns of precipitates obtained by allowing the  $\alpha$ -CD/HFIP/2-pentanol gel [an  $\alpha$ -CD/HFIP solution [25 mM]:2-pentanol = 1:5 (v/v)] to stand at 50 °C under high humidity conditions for (a) 6 h, (b) 12 h, (c) 36 h, (d) 48 h and (e) 120 h.

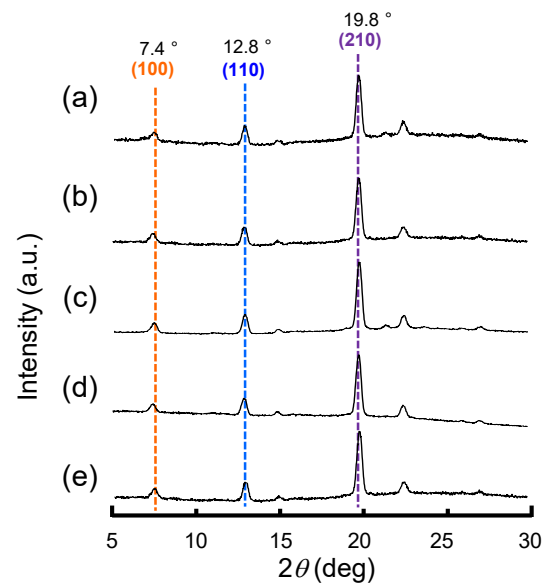

**Figure S14.** XRD patterns of precipitates obtained by allowing the  $\alpha$ -CD/HFIP/2-pentanol gel [an  $\alpha$ -CD/HFIP solution [25 mM]:2-pentanol = 1:5 (v/v)] to stand at 60 °C under high humidity conditions for (a) 6 h, (b) 12 h, (c) 36 h, (d) 48 h and (e) 120 h.

## 5. Molar ratios of H<sub>2</sub>O and 2-pentanol to $\alpha$ -CD contained in microrods

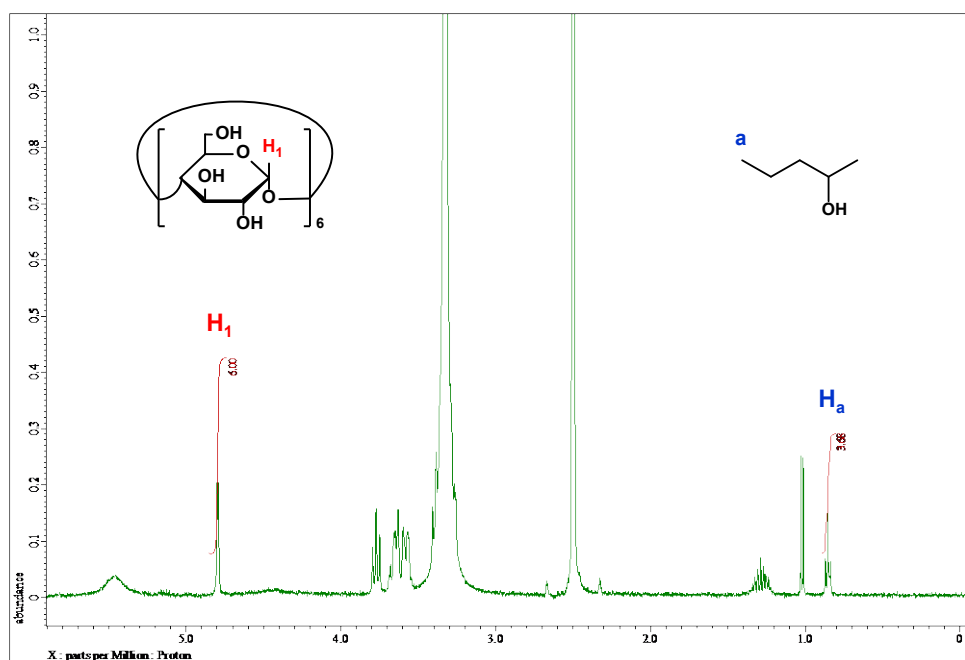

**Figure S15.** <sup>1</sup>H NMR spectrum (solvent: DMSO-*d*<sub>6</sub>) of microrods obtained by allowing the  $\alpha$ -CD/HFIP/2-pentanol gel to stand for 120 h at 20 °C under high humidity conditions.

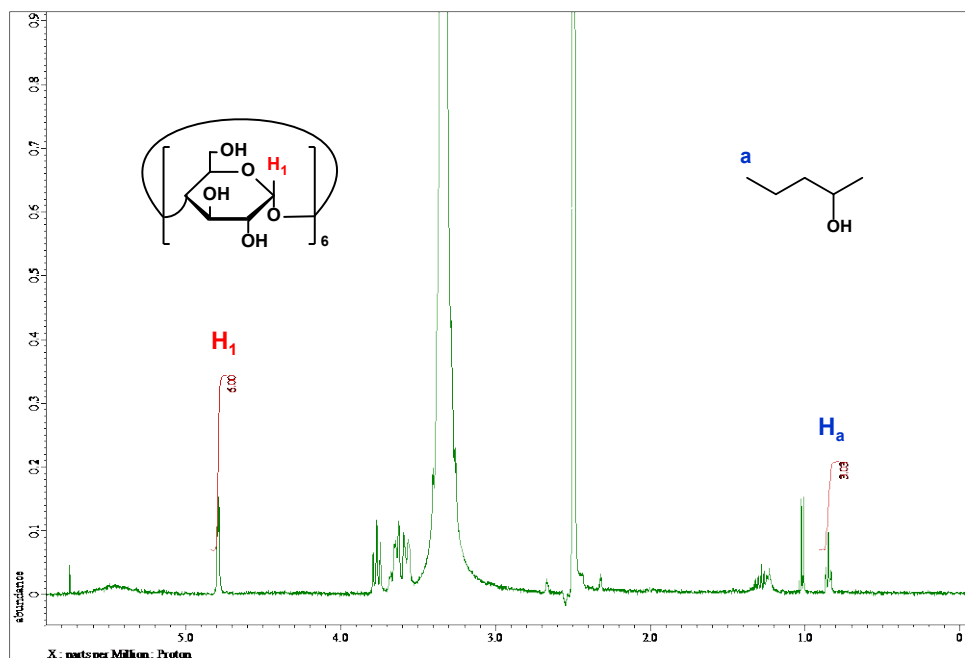

**Figure S16.** <sup>1</sup>H NMR spectrum (solvent: DMSO-*d*<sub>6</sub>) of microrods obtained by allowing the  $\alpha$ -CD/HFIP/2-pentanol gel to stand for 120 h at 30 °C under high humidity conditions.

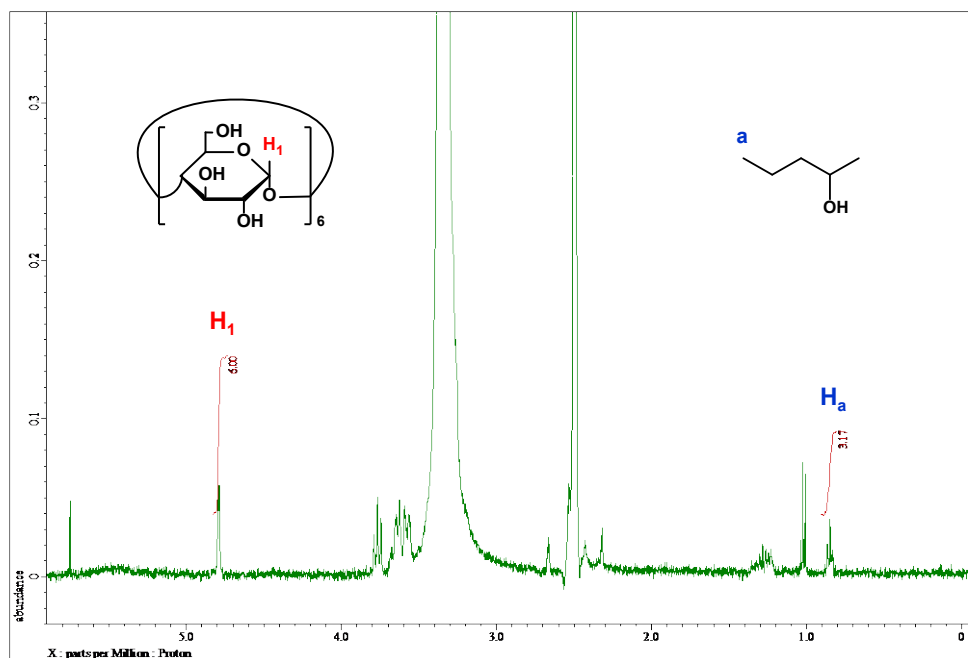

**Figure S17.** <sup>1</sup>H NMR spectrum (solvent: DMSO-*d*<sub>6</sub>) of microrods obtained by allowing the α-CD/HFIP/2-pentanol gel to stand for 120 h at 40 °C under high humidity conditions.

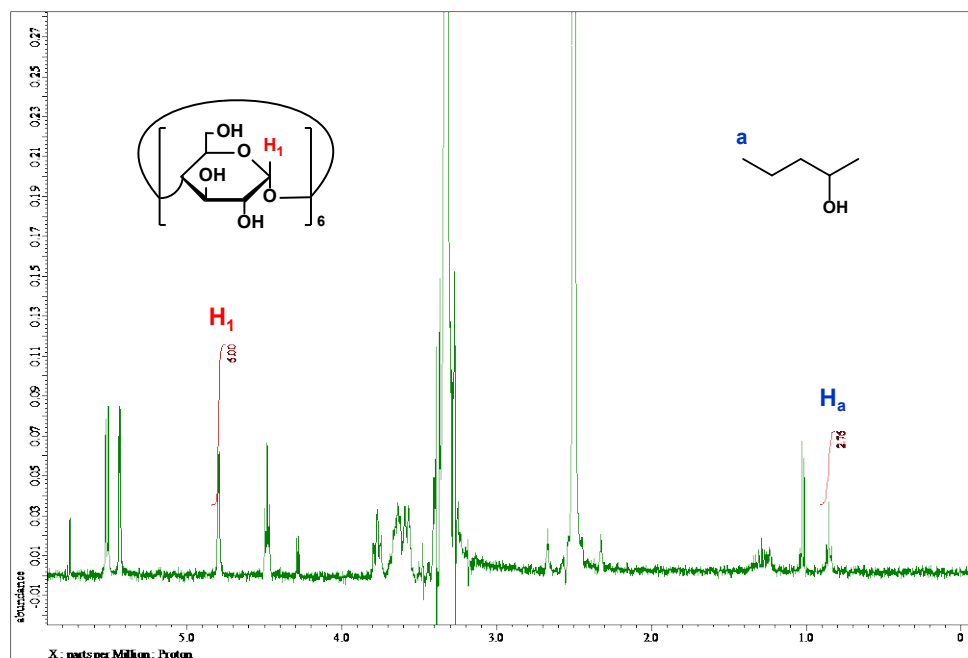

**Figure S18.** <sup>1</sup>H NMR spectrum (solvent: DMSO-*d*<sub>6</sub>) of microrods obtained by allowing the α-CD/HFIP/2-pentanol gel to stand for 120 h at 50 °C under high humidity conditions.

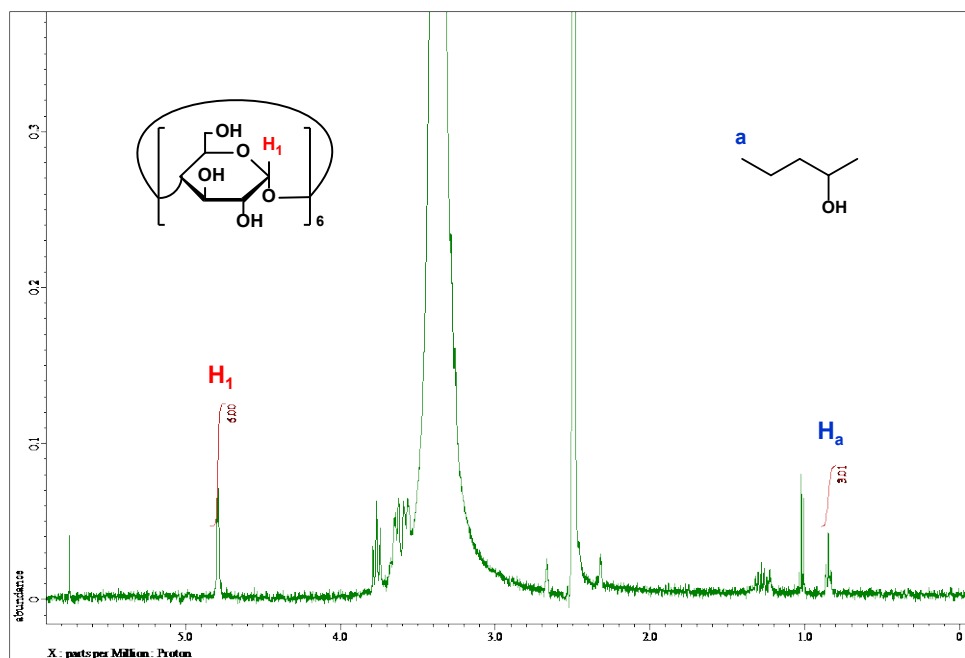

**Figure S19.**  $^1\text{H}$  NMR spectrum (solvent:  $\text{DMSO-}d_6$ ) of microrods obtained by allowing the  $\alpha$ -CD/HFIP/2-pentanol gel to stand for 120 h at 60 °C under high humidity conditions.

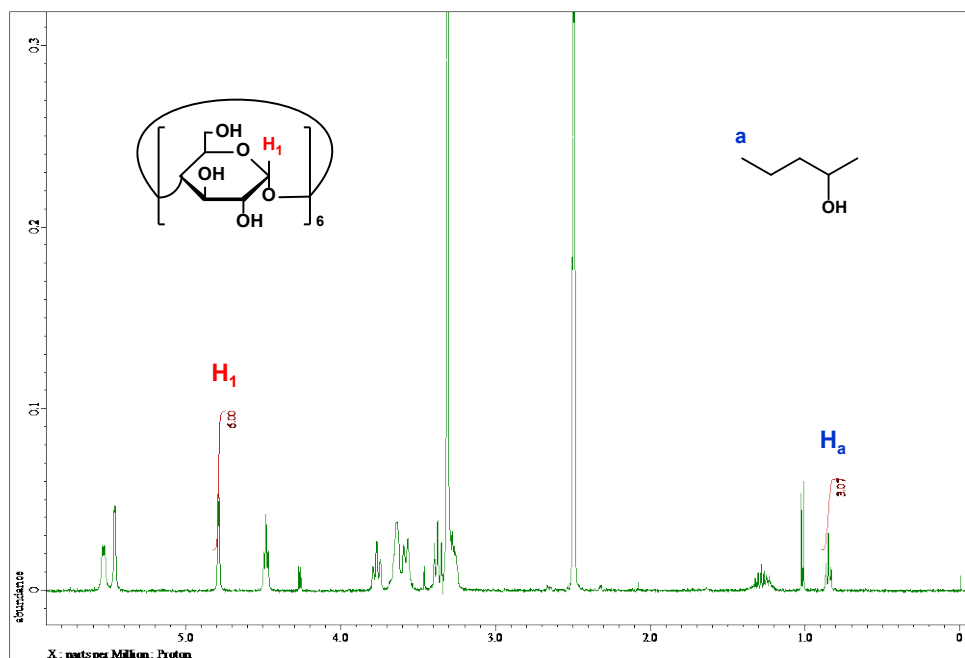

**Figure S20.**  $^1\text{H}$  NMR spectrum (solvent:  $\text{DMSO-}d_6$ ) of the solid obtained after drying the  $\alpha$ -CD/HFIP/2-pentanol gel for 24 h *in vacuo*.
